# Supplementary material for: Three Rings Schiff Base Ester Liquid Crystals: Experimental and Computational Approaches of Mesogenic Core Orientation Effect, Heterocycle Impact
Source: MDPI journal article supplement (doi:10.3390/molecules27072304), 2022-04-01
Supplement: s1 [file s1]

# Three Rings Schiff Base Ester Liquid Crystals: Experimental and Computational Approaches of Mesogenic Core Orientation Effect, Heterocycle Impact

Shady Nada <sup>1</sup>, Mohamed Hagar <sup>1,\*</sup> Omaima Farahat <sup>1</sup>, Ahmed A. Hasanein <sup>1</sup>, Abdul-Hamid Emwas <sup>2</sup>, Abeer Ali Sharfalddin <sup>3</sup>, Mariusz Jaremko <sup>4</sup> and Mohamed A. Zakaria <sup>1</sup>

<sup>1</sup> Department of Chemistry, Faculty of Science, Alexandria University, Alexandria 21321, Egypt; shadyadel4869@gmail.com (S.N.); oom\_farahat@yahoo.com (O.F.); ahmedhasanein@alexu.edu.eg (A.A.H.); mohamed.zakaria@alexu.edu.eg (M.A.Z.)

<sup>2</sup> Core Labs, King Abdullah University of Science and Technology, P.O. Box 4700, Thuwal 23955–6900, Saudi Arabia; abdelhamid.emwas@kaust.edu.sa

<sup>3</sup> Department of Chemistry, Faculty of Science, King Abdulaziz University, P.O. Box 80203, Jeddah 21589, Saudi Arabia; sharfalddin.aa@hotmail.com

<sup>4</sup> Smart-Health Initiative (SHI) and Red Sea Research Center (RSRC), Division of Biological and Environmental Sciences and Engineering (BESE), King Abdullah University of Science and Technology (KAUST), P.O.Box 4700, Thuwal 23955–6900, Saudi Arabia; mariusz.jaremko@kaust.edu.sa

\* Correspondence: mohamed.hagar@alexu.edu.eg

## Coordinates of the investigated compounds

I Cs Compound (in Angstrom Å)

|   |               |              |              |
|---|---------------|--------------|--------------|
| 6 | -14.776023000 | 0.223987000  | -0.181545000 |
| 6 | -13.406316000 | 0.893647000  | -0.323927000 |
| 6 | -12.234797000 | -0.071373000 | -0.107762000 |
| 6 | -10.859640000 | 0.591717000  | -0.243317000 |
| 6 | -9.689048000  | -0.372789000 | -0.021911000 |
| 6 | -8.315198000  | 0.295553000  | -0.148801000 |
| 6 | -7.149656000  | -0.672468000 | 0.083391000  |
| 6 | -5.795299000  | 0.008629000  | -0.029586000 |
| 8 | -4.789664000  | -0.978154000 | 0.213116000  |
| 6 | -3.480761000  | -0.607280000 | 0.200313000  |
| 6 | -2.556301000  | -1.620505000 | 0.493294000  |
| 6 | -1.199469000  | -1.351931000 | 0.505991000  |
| 6 | -0.718559000  | -0.057200000 | 0.230843000  |
| 6 | -1.653197000  | 0.951484000  | -0.024757000 |
| 6 | -3.018797000  | 0.687172000  | -0.059957000 |
| 7 | 0.635816000   | 0.308342000  | 0.240066000  |
| 6 | 1.556356000   | -0.532210000 | -0.038275000 |
| 6 | 2.979672000   | -0.179405000 | 0.019620000  |
| 6 | 3.943591000   | -1.139512000 | -0.318140000 |
| 6 | 5.298104000   | -0.836243000 | -0.271419000 |
| 6 | 5.709900000   | 0.443456000  | 0.115506000  |
| 6 | 4.750105000   | 1.408693000  | 0.456753000  |
| 6 | 3.402211000   | 1.102438000  | 0.410393000  |
| 6 | 7.142105000   | 0.834600000  | 0.190935000  |

|   |               |              |              |
|---|---------------|--------------|--------------|
| 8 | 7.541392000   | 1.912089000  | 0.553611000  |
| 8 | 7.948458000   | -0.197253000 | -0.204615000 |
| 6 | 9.336432000   | -0.144818000 | -0.205893000 |
| 7 | 9.873345000   | -1.341199000 | -0.043460000 |
| 6 | 11.205802000  | -1.433411000 | -0.082394000 |
| 6 | 12.042040000  | -0.341532000 | -0.285575000 |
| 6 | 11.451135000  | 0.907754000  | -0.458571000 |
| 6 | 10.066952000  | 1.025943000  | -0.422931000 |
| 1 | -15.588862000 | 0.937048000  | -0.343857000 |
| 1 | -14.904708000 | -0.204367000 | 0.817424000  |
| 1 | -14.896626000 | -0.587486000 | -0.906084000 |
| 1 | -13.327910000 | 1.720914000  | 0.391862000  |
| 1 | -13.322106000 | 1.345254000  | -1.319849000 |
| 1 | -12.311425000 | -0.898291000 | -0.825676000 |
| 1 | -12.321331000 | -0.525639000 | 0.887870000  |
| 1 | -10.785766000 | 1.419854000  | 0.473348000  |
| 1 | -10.772592000 | 1.044007000  | -1.239682000 |
| 1 | -9.757473000  | -1.198443000 | -0.741397000 |
| 1 | -9.777782000  | -0.827952000 | 0.972603000  |
| 1 | -8.251127000  | 1.123762000  | 0.568510000  |
| 1 | -8.224430000  | 0.746846000  | -1.145082000 |
| 1 | -7.190268000  | -1.492731000 | -0.640910000 |
| 1 | -7.228917000  | -1.125067000 | 1.077357000  |
| 1 | -5.705532000  | 0.818047000  | 0.706282000  |
| 1 | -5.658634000  | 0.440339000  | -1.029562000 |
| 1 | -2.934895000  | -2.609214000 | 0.723011000  |

|   |              |              |              |
|---|--------------|--------------|--------------|
| 1 | -0.507426000 | -2.143669000 | 0.768278000  |
| 1 | -1.284818000 | 1.953306000  | -0.210224000 |
| 1 | -3.708163000 | 1.491696000  | -0.276566000 |
| 1 | 1.337248000  | -1.562161000 | -0.350042000 |
| 1 | 3.626084000  | -2.132957000 | -0.617680000 |
| 1 | 6.039487000  | -1.581300000 | -0.526185000 |
| 1 | 5.088627000  | 2.392425000  | 0.757222000  |
| 1 | 2.650768000  | 1.836354000  | 0.672181000  |
| 1 | 11.614726000 | -2.429951000 | 0.055591000  |
| 1 | 13.117370000 | -0.467332000 | -0.307341000 |
| 1 | 12.059899000 | 1.789672000  | -0.622065000 |
| 1 | 9.572894000  | 1.977187000  | -0.536150000 |

---

**I C<sub>16</sub> Compound (in Angstrom Å)**

|   |              |              |              |
|---|--------------|--------------|--------------|
| 6 | 10.278185000 | -0.449050000 | 0.027183000  |
| 6 | 8.938648000  | 0.296357000  | 0.021592000  |
| 6 | 7.721033000  | -0.631424000 | -0.058842000 |
| 6 | 6.380243000  | 0.111714000  | -0.058166000 |
| 6 | 5.165664000  | -0.818486000 | -0.151802000 |
| 6 | 3.823625000  | -0.077351000 | -0.140087000 |
| 6 | 2.617592000  | -1.016450000 | -0.253602000 |
| 6 | 1.291759000  | -0.273256000 | -0.222566000 |
| 8 | 0.248591000  | -1.241119000 | -0.361275000 |
| 6 | -1.046701000 | -0.825723000 | -0.362417000 |

|   |               |              |              |
|---|---------------|--------------|--------------|
| 6 | -2.009189000  | -1.830218000 | -0.541457000 |
| 6 | -3.356742000  | -1.518877000 | -0.552076000 |
| 6 | -3.790421000  | -0.189051000 | -0.388089000 |
| 6 | -2.818715000  | 0.807419000  | -0.249800000 |
| 6 | -1.461391000  | 0.502382000  | -0.218783000 |
| 7 | -5.132736000  | 0.219136000  | -0.394029000 |
| 6 | -6.070195000  | -0.565394000 | -0.023468000 |
| 6 | -7.482870000  | -0.170795000 | -0.065457000 |
| 6 | -8.464133000  | -1.072756000 | 0.368960000  |
| 6 | -9.809265000  | -0.728243000 | 0.345116000  |
| 6 | -10.194142000 | 0.535009000  | -0.116408000 |
| 6 | -9.217142000  | 1.441496000  | -0.555937000 |
| 6 | -7.878571000  | 1.094201000  | -0.531830000 |
| 6 | -11.615189000 | 0.968806000  | -0.168186000 |
| 8 | -11.993249000 | 2.031148000  | -0.593412000 |
| 8 | -12.436095000 | -0.004127000 | 0.331401000  |
| 6 | -13.820382000 | 0.086889000  | 0.392759000  |
| 7 | -14.386054000 | -1.107620000 | 0.410869000  |
| 6 | -15.716111000 | -1.163027000 | 0.522284000  |
| 6 | -16.522810000 | -0.034949000 | 0.621395000  |
| 6 | -15.902425000 | 1.211700000  | 0.603939000  |
| 6 | -14.519591000 | 1.292689000  | 0.489158000  |
| 1 | 10.349086000  | -1.071117000 | -0.874473000 |
| 1 | 10.301705000  | -1.143600000 | 0.876814000  |
| 1 | 8.917049000   | 0.995172000  | -0.824577000 |
| 1 | 8.864523000   | 0.913497000  | 0.926361000  |

|   |               |              |              |
|---|---------------|--------------|--------------|
| 1 | 7.745135000   | -1.333844000 | 0.784204000  |
| 1 | 7.793652000   | -1.244671000 | -0.966320000 |
| 1 | 6.358597000   | 0.820128000  | -0.896264000 |
| 1 | 6.303217000   | 0.717812000  | 0.853766000  |
| 1 | 5.190281000   | -1.532447000 | 0.681067000  |
| 1 | 5.238444000   | -1.417873000 | -1.068115000 |
| 1 | 3.803622000   | 0.645314000  | -0.965725000 |
| 1 | 3.745662000   | 0.511088000  | 0.783101000  |
| 1 | 2.628440000   | -1.744293000 | 0.564425000  |
| 1 | 2.673090000   | -1.588689000 | -1.185564000 |
| 1 | 1.233756000   | 0.454362000  | -1.042340000 |
| 1 | 1.172485000   | 0.269098000  | 0.724178000  |
| 1 | -1.667184000  | -2.848205000 | -0.684204000 |
| 1 | -4.078673000  | -2.308536000 | -0.724547000 |
| 1 | -3.151224000  | 1.833803000  | -0.151189000 |
| 1 | -0.742466000  | 1.300502000  | -0.094076000 |
| 1 | -5.873916000  | -1.574319000 | 0.363125000  |
| 1 | -8.167472000  | -2.053151000 | 0.727152000  |
| 1 | -10.564208000 | -1.428297000 | 0.676243000  |
| 1 | -9.534828000  | 2.413242000  | -0.912885000 |
| 1 | -7.114161000  | 1.783216000  | -0.867699000 |
| 1 | -16.148263000 | -2.159288000 | 0.532519000  |
| 1 | -17.597783000 | -0.131838000 | 0.708975000  |
| 1 | -16.486961000 | 2.121453000  | 0.680121000  |
| 1 | -14.004201000 | 2.238535000  | 0.455460000  |
| 6 | 11.497615000  | 0.477125000  | 0.098020000  |

|   |              |              |              |
|---|--------------|--------------|--------------|
| 1 | 11.475236000 | 1.169780000  | -0.753207000 |
| 1 | 11.426387000 | 1.101163000  | 0.998297000  |
| 6 | 12.836264000 | -0.269870000 | 0.106119000  |
| 1 | 12.905071000 | -0.897381000 | -0.791937000 |
| 1 | 12.860296000 | -0.959437000 | 0.959808000  |
| 6 | 14.056785000 | 0.655393000  | 0.169665000  |
| 1 | 14.032775000 | 1.344354000  | -0.684525000 |
| 1 | 13.988374000 | 1.283504000  | 1.067331000  |
| 6 | 15.395002000 | -0.092379000 | 0.177543000  |
| 1 | 15.461744000 | -0.722773000 | -0.718642000 |
| 1 | 15.420407000 | -0.779235000 | 1.033377000  |
| 6 | 16.616007000 | 0.832619000  | 0.235841000  |
| 1 | 16.589960000 | 1.519735000  | -0.619806000 |
| 1 | 16.549970000 | 1.462742000  | 1.132302000  |
| 6 | 17.954190000 | 0.085167000  | 0.242032000  |
| 1 | 18.020613000 | -0.546080000 | -0.653773000 |
| 1 | 17.982164000 | -0.601167000 | 1.098420000  |
| 6 | 19.175745000 | 1.009661000  | 0.297777000  |
| 1 | 19.147736000 | 1.695492000  | -0.557650000 |
| 1 | 19.110480000 | 1.639527000  | 1.193341000  |
| 6 | 20.507974000 | 0.254471000  | 0.302204000  |
| 1 | 20.619591000 | -0.356032000 | -0.599396000 |
| 1 | 21.357483000 | 0.941684000  | 0.344511000  |
| 1 | 20.579787000 | -0.415550000 | 1.164743000  |

---

## II C<sub>6</sub> Compound (in Angstrom Å)

|   |               |              |              |
|---|---------------|--------------|--------------|
| 6 | -13.283298000 | -0.033812000 | 0.526323000  |
| 6 | -11.910672000 | 0.619004000  | 0.712640000  |
| 6 | -10.756278000 | -0.240867000 | 0.185894000  |
| 6 | -9.377051000  | 0.400487000  | 0.376933000  |
| 6 | -8.231924000  | -0.464379000 | -0.161496000 |
| 6 | -6.867248000  | 0.169755000  | 0.054821000  |
| 8 | -5.886670000  | -0.714074000 | -0.493928000 |
| 6 | -4.570268000  | -0.382439000 | -0.404439000 |
| 6 | -3.671675000  | -1.289085000 | -0.985409000 |
| 6 | -2.309201000  | -1.053883000 | -0.941890000 |
| 6 | -1.796976000  | 0.100883000  | -0.319819000 |
| 6 | -2.706328000  | 1.017087000  | 0.218640000  |
| 6 | -4.077272000  | 0.780081000  | 0.197519000  |
| 7 | -0.433737000  | 0.422157000  | -0.236667000 |
| 6 | 0.463088000   | -0.486402000 | -0.198766000 |
| 6 | 1.895497000   | -0.170231000 | -0.156097000 |
| 6 | 2.830555000   | -1.211904000 | -0.082693000 |
| 6 | 4.192542000   | -0.943844000 | -0.032912000 |
| 6 | 4.642565000   | 0.380051000  | -0.058151000 |
| 6 | 3.711407000   | 1.426921000  | -0.134608000 |
| 6 | 2.355524000   | 1.156947000  | -0.182975000 |
| 6 | 6.085257000   | 0.740269000  | -0.007067000 |
| 8 | 6.871241000   | -0.375729000 | 0.107598000  |
| 8 | 6.515259000   | 1.863051000  | -0.054947000 |



|   |               |              |              |
|---|---------------|--------------|--------------|
| 6 | 8.261909000   | -0.276533000 | 0.184592000  |
| 6 | 8.875203000   | -1.049381000 | 1.164960000  |
| 6 | 10.264466000  | -1.065455000 | 1.253424000  |
| 6 | 11.031114000  | -0.311023000 | 0.367947000  |
| 6 | 10.400910000  | 0.456771000  | -0.609399000 |
| 6 | 9.011927000   | 0.479327000  | -0.711740000 |
| 1 | -14.084091000 | 0.603696000  | 0.910497000  |
| 1 | -13.340086000 | -0.991718000 | 1.052531000  |
| 1 | -13.489936000 | -0.225447000 | -0.531219000 |
| 1 | -11.747740000 | 0.828946000  | 1.776727000  |
| 1 | -11.896880000 | 1.591343000  | 0.205561000  |
| 1 | -10.915528000 | -0.445753000 | -0.880457000 |
| 1 | -10.773246000 | -1.216288000 | 0.688468000  |
| 1 | -9.217286000  | 0.597662000  | 1.444744000  |
| 1 | -9.362579000  | 1.378811000  | -0.120033000 |
| 1 | -8.366941000  | -0.642986000 | -1.233380000 |
| 1 | -8.239868000  | -1.445385000 | 0.325011000  |
| 1 | -6.674447000  | 0.320277000  | 1.124808000  |
| 1 | -6.807067000  | 1.146001000  | -0.443388000 |
| 1 | -4.074346000  | -2.166669000 | -1.476684000 |
| 1 | -1.637045000  | -1.753115000 | -1.425399000 |
| 1 | -2.313969000  | 1.919469000  | 0.671960000  |
| 1 | -4.746582000  | 1.505899000  | 0.638663000  |
| 1 | 0.214625000   | -1.555993000 | -0.177594000 |
| 1 | 2.483805000   | -2.240038000 | -0.062740000 |
| 1 | 4.909286000   | -1.751587000 | 0.024821000  |

|   |              |              |              |
|---|--------------|--------------|--------------|
| 1 | 4.078883000  | 2.445334000  | -0.154759000 |
| 1 | 1.626704000  | 1.955292000  | -0.240997000 |
| 1 | 8.258538000  | -1.627619000 | 1.842133000  |
| 1 | 10.745011000 | -1.667417000 | 2.016099000  |
| 1 | 12.112516000 | -0.321399000 | 0.438200000  |
| 1 | 10.991759000 | 1.045809000  | -1.301502000 |
| 1 | 8.521388000  | 1.081710000  | -1.462589000 |

---

### III C<sub>6</sub> Compound (in Angstrom Å)

|   |               |              |              |
|---|---------------|--------------|--------------|
| 6 | -13.272839000 | 0.437612000  | -0.382742000 |
| 6 | -11.862790000 | 0.956626000  | -0.677551000 |
| 6 | -10.756670000 | 0.058760000  | -0.111997000 |
| 6 | -9.342447000  | 0.575498000  | -0.398917000 |
| 6 | -8.241992000  | -0.325160000 | 0.172814000  |
| 6 | -6.846502000  | 0.207532000  | -0.110283000 |
| 8 | -5.907644000  | -0.699512000 | 0.469394000  |
| 6 | -4.576462000  | -0.425533000 | 0.369917000  |
| 6 | -3.715936000  | -1.333939000 | 1.001040000  |
| 6 | -2.344588000  | -1.149165000 | 0.959013000  |
| 6 | -1.785640000  | -0.045708000 | 0.287338000  |
| 6 | -2.657265000  | 0.871744000  | -0.307540000 |
| 6 | -4.036266000  | 0.684469000  | -0.287599000 |
| 7 | -0.409582000  | 0.224275000  | 0.215896000  |
| 6 | 0.448950000   | -0.720945000 | 0.193736000  |

|   |               |              |              |
|---|---------------|--------------|--------------|
| 6 | 1.893632000   | -0.471596000 | 0.176254000  |
| 6 | 2.785784000   | -1.549446000 | 0.122531000  |
| 6 | 4.163031000   | -1.353353000 | 0.103914000  |
| 6 | 4.651400000   | -0.050072000 | 0.135650000  |
| 6 | 3.782308000   | 1.041213000  | 0.192002000  |
| 6 | 2.414139000   | 0.831593000  | 0.213393000  |
| 8 | 6.005868000   | 0.264278000  | 0.198809000  |
| 6 | 6.950816000   | -0.412433000 | -0.527166000 |
| 8 | 6.700020000   | -1.315000000 | -1.282080000 |
| 6 | 8.315514000   | 0.119138000  | -0.260659000 |
| 6 | 9.380964000   | -0.458873000 | -0.960590000 |
| 6 | 10.678267000  | -0.006957000 | -0.752722000 |
| 6 | 10.920086000  | 1.023143000  | 0.156065000  |
| 6 | 9.861791000   | 1.600736000  | 0.856051000  |
| 6 | 8.560879000   | 1.153098000  | 0.650260000  |
| 1 | -14.037072000 | 1.099532000  | -0.798885000 |
| 1 | -13.449488000 | 0.362865000  | 0.694776000  |
| 1 | -13.426313000 | -0.557519000 | -0.811816000 |
| 1 | -11.752398000 | 1.967076000  | -0.265506000 |
| 1 | -11.728769000 | 1.054661000  | -1.761665000 |
| 1 | -10.864135000 | -0.951950000 | -0.526073000 |
| 1 | -10.891883000 | -0.041569000 | 0.972497000  |
| 1 | -9.238760000  | 1.586877000  | 0.014731000  |
| 1 | -9.208312000  | 0.674405000  | -1.483714000 |
| 1 | -8.322860000  | -1.333034000 | -0.247738000 |
| 1 | -8.362471000  | -0.425279000 | 1.256623000  |

|   |              |              |              |
|---|--------------|--------------|--------------|
| 1 | -6.716411000 | 1.206211000  | 0.326754000  |
| 1 | -6.671592000 | 0.284324000  | -1.191433000 |
| 1 | -4.152843000 | -2.171374000 | 1.531755000  |
| 1 | -1.700628000 | -1.846237000 | 1.482726000  |
| 1 | -2.230287000 | 1.736025000  | -0.802136000 |
| 1 | -4.674907000 | 1.409690000  | -0.773256000 |
| 1 | 0.152181000  | -1.778729000 | 0.171990000  |
| 1 | 2.397653000  | -2.562508000 | 0.094370000  |
| 1 | 4.839628000  | -2.192512000 | 0.049871000  |
| 1 | 4.198974000  | 2.040656000  | 0.220810000  |
| 1 | 1.723445000  | 1.664114000  | 0.257148000  |
| 1 | 9.169815000  | -1.258022000 | -1.660013000 |
| 1 | 11.500888000 | -0.456187000 | -1.296994000 |
| 1 | 11.932588000 | 1.375413000  | 0.318672000  |
| 1 | 10.050686000 | 2.400713000  | 1.562600000  |
| 1 | 7.735405000  | 1.596386000  | 1.190364000  |

---

#### IV Cs Compound (in Angstrom Å)

|   |              |              |              |
|---|--------------|--------------|--------------|
| 6 | 11.980655000 | -0.589587000 | -0.003007000 |
| 6 | 13.253359000 | 0.264373000  | 0.031282000  |
| 6 | 10.687607000 | 0.232348000  | 0.040314000  |
| 6 | 9.416495000  | -0.623197000 | -0.000202000 |
| 6 | 14.539810000 | -0.565263000 | -0.010073000 |
| 6 | 8.124073000  | 0.200024000  | 0.050915000  |

|   |               |              |              |
|---|---------------|--------------|--------------|
| 6 | 6.858669000   | -0.663142000 | -0.008180000 |
| 6 | 5.585794000   | 0.164619000  | 0.058471000  |
| 8 | 4.475735000   | -0.737437000 | -0.031864000 |
| 6 | 3.213815000   | -0.247257000 | -0.002744000 |
| 6 | 2.888903000   | 1.108911000  | 0.136180000  |
| 6 | 1.554775000   | 1.494926000  | 0.152566000  |
| 6 | 0.528419000   | 0.554311000  | 0.030618000  |
| 6 | 0.864076000   | -0.802391000 | -0.108288000 |
| 6 | 2.188063000   | -1.198029000 | -0.124061000 |
| 6 | -0.866142000  | 1.047697000  | 0.054688000  |
| 8 | -1.192320000  | 2.200950000  | 0.177341000  |
| 8 | -1.759054000  | 0.010363000  | -0.078884000 |
| 6 | -3.135093000  | 0.186073000  | -0.108919000 |
| 6 | -3.776827000  | 1.297238000  | -0.653018000 |
| 6 | -5.167854000  | 1.313044000  | -0.684294000 |
| 6 | -5.925651000  | 0.245562000  | -0.189602000 |
| 6 | -5.254648000  | -0.863517000 | 0.349452000  |
| 6 | -3.872188000  | -0.892644000 | 0.389419000  |
| 6 | -7.388728000  | 0.304665000  | -0.247048000 |
| 7 | -8.135112000  | -0.652743000 | 0.147683000  |
| 6 | -9.533633000  | -0.519353000 | 0.121679000  |
| 6 | -10.200252000 | 0.656224000  | 0.501416000  |
| 6 | -11.590811000 | 0.713972000  | 0.476918000  |
| 6 | -12.336164000 | -0.391295000 | 0.072058000  |
| 6 | -11.679392000 | -1.567507000 | -0.291483000 |
| 6 | -10.292371000 | -1.638357000 | -0.251395000 |

|   |              |              |              |
|---|--------------|--------------|--------------|
| 1 | 11.993352000 | -1.289689000 | 0.842382000  |
| 1 | 11.986321000 | -1.208976000 | -0.909317000 |
| 1 | 13.247160000 | 0.884081000  | 0.936173000  |
| 1 | 13.241712000 | 0.962447000  | -0.814509000 |
| 1 | 10.677492000 | 0.934997000  | -0.802852000 |
| 1 | 10.680964000 | 0.848251000  | 0.948859000  |
| 1 | 9.427377000  | -1.329656000 | 0.839264000  |
| 1 | 9.419430000  | -1.233988000 | -0.911766000 |
| 1 | 15.427715000 | 0.072221000  | 0.016223000  |
| 1 | 14.591663000 | -1.169266000 | -0.921348000 |
| 1 | 14.596791000 | -1.249196000 | 0.842508000  |
| 1 | 8.118885000  | 0.914151000  | -0.782312000 |
| 1 | 8.116502000  | 0.801353000  | 0.968950000  |
| 1 | 6.852391000  | -1.380596000 | 0.818924000  |
| 1 | 6.845396000  | -1.248019000 | -0.933734000 |
| 1 | 5.543333000  | 0.883172000  | -0.769335000 |
| 1 | 5.532369000  | 0.722860000  | 1.001250000  |
| 1 | 3.660958000  | 1.859776000  | 0.230835000  |
| 1 | 1.289823000  | 2.539410000  | 0.260643000  |
| 1 | 0.079058000  | -1.539882000 | -0.205541000 |
| 1 | 2.464443000  | -2.239629000 | -0.231066000 |
| 1 | -3.206475000 | 2.132916000  | -1.025919000 |
| 1 | -5.673701000 | 2.176167000  | -1.104929000 |
| 1 | -5.840447000 | -1.690308000 | 0.730988000  |
| 1 | -3.339393000 | -1.740829000 | 0.801629000  |
| 1 | -7.809651000 | 1.227484000  | -0.670361000 |

|   |               |              |              |
|---|---------------|--------------|--------------|
| 1 | -9.627496000  | 1.508243000  | 0.849458000  |
| 1 | -12.093586000 | 1.624503000  | 0.784204000  |
| 1 | -13.418871000 | -0.342877000 | 0.055458000  |
| 1 | -12.252052000 | -2.436271000 | -0.596889000 |
| 1 | -9.769110000  | -2.549351000 | -0.516374000 |

---

V C<sub>6</sub> Compound (in Angstrom Å)

|   |               |              |              |
|---|---------------|--------------|--------------|
| 6 | -3.879359000  | 0.854396000  | 0.518413000  |
| 6 | -4.275160000  | -0.251782000 | -0.244900000 |
| 6 | -3.302271000  | -1.053472000 | -0.862175000 |
| 6 | -1.959756000  | -0.757220000 | -0.718212000 |
| 6 | -1.553410000  | 0.349056000  | 0.044957000  |
| 6 | -2.527268000  | 1.143310000  | 0.655123000  |
| 6 | -0.133824000  | 0.723896000  | 0.236943000  |
| 8 | -5.561328000  | -0.628425000 | -0.446229000 |
| 6 | -6.620196000  | 0.131598000  | 0.148090000  |
| 6 | -7.933731000  | -0.525640000 | -0.242803000 |
| 6 | -9.151288000  | 0.202604000  | 0.337422000  |
| 6 | -10.483089000 | -0.452840000 | -0.045671000 |
| 6 | -11.707601000 | 0.267858000  | 0.529275000  |
| 6 | -13.033767000 | -0.393373000 | 0.143600000  |
| 8 | 0.254214000   | 1.674680000  | 0.866472000  |
| 8 | 0.704497000   | -0.159813000 | -0.398265000 |
| 6 | 2.087490000   | 0.008122000  | -0.359231000 |

|   |               |              |              |
|---|---------------|--------------|--------------|
| 6 | 2.840321000   | -1.133970000 | -0.109448000 |
| 6 | 4.228760000   | -1.067054000 | -0.132206000 |
| 6 | 4.877376000   | 0.146078000  | -0.408072000 |
| 6 | 4.096333000   | 1.275270000  | -0.693517000 |
| 6 | 2.709985000   | 1.219204000  | -0.656461000 |
| 7 | 6.273839000   | 0.282819000  | -0.470520000 |
| 6 | 7.023766000   | -0.337741000 | 0.354769000  |
| 6 | 8.489133000   | -0.275117000 | 0.296549000  |
| 6 | 9.246426000   | -0.955020000 | 1.259068000  |
| 6 | 10.637319000  | -0.909969000 | 1.227217000  |
| 6 | 11.285202000  | -0.183234000 | 0.231264000  |
| 6 | 10.537817000  | 0.498216000  | -0.733062000 |
| 6 | 9.151400000   | 0.453733000  | -0.703650000 |
| 1 | -4.609997000  | 1.487393000  | 1.002399000  |
| 1 | -3.633366000  | -1.902065000 | -1.447976000 |
| 1 | -1.214102000  | -1.377839000 | -1.196489000 |
| 1 | -2.206727000  | 1.995715000  | 1.241288000  |
| 1 | -6.579227000  | 1.166785000  | -0.212899000 |
| 1 | -6.499226000  | 0.143093000  | 1.238435000  |
| 1 | -7.918144000  | -1.565519000 | 0.099881000  |
| 1 | -7.997473000  | -0.554474000 | -1.335526000 |
| 1 | -9.152085000  | 1.245581000  | -0.004122000 |
| 1 | -9.069751000  | 0.239284000  | 1.431281000  |
| 1 | -10.483862000 | -1.495873000 | 0.295569000  |
| 1 | -10.566150000 | -0.490892000 | -1.139309000 |
| 1 | -11.706167000 | 1.309989000  | 0.187468000  |



|   |               |              |              |
|---|---------------|--------------|--------------|
| 1 | -11.622964000 | 0.306630000  | 1.622046000  |
| 1 | -13.080240000 | -1.426079000 | 0.502948000  |
| 1 | -13.163492000 | -0.415855000 | -0.942912000 |
| 1 | 2.329260000   | -2.068540000 | 0.087897000  |
| 1 | 4.810876000   | -1.966520000 | 0.030071000  |
| 1 | 4.601960000   | 2.202577000  | -0.933686000 |
| 1 | 2.119089000   | 2.102156000  | -0.852895000 |
| 1 | 6.607270000   | -0.945579000 | 1.170278000  |
| 1 | 8.739831000   | -1.519800000 | 2.035409000  |
| 1 | 11.213886000  | -1.439336000 | 1.977238000  |
| 1 | 12.368489000  | -0.146329000 | 0.203926000  |
| 1 | 11.043228000  | 1.063550000  | -1.508052000 |
| 1 | 8.555372000   | 0.975132000  | -1.442328000 |
| 1 | -13.885882000 | 0.144085000  | 0.568183000  |

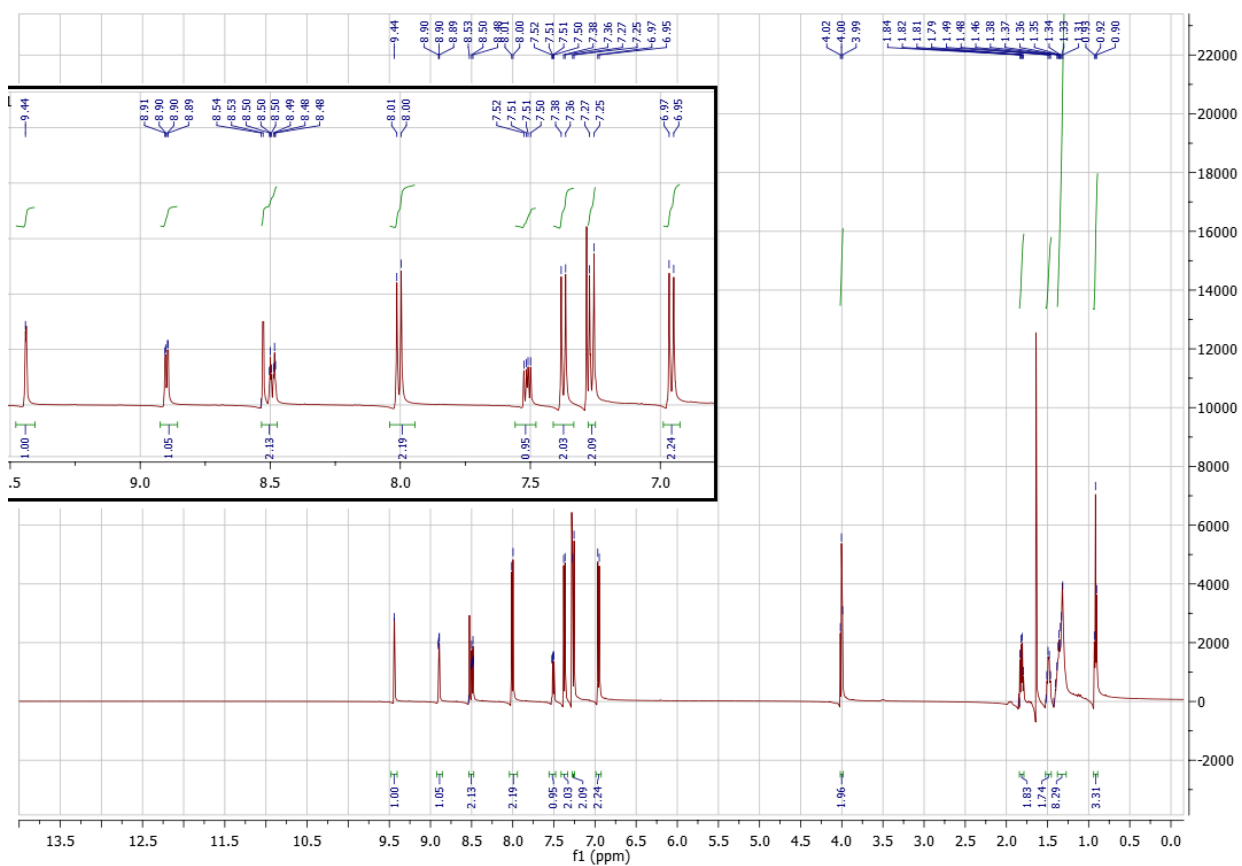

**Figure S1.**  $^1\text{H}$ NMR of Pyridin-2-yl 4-[4-(octyloxy)phenyliminomethyl]benzoate (I Cs).

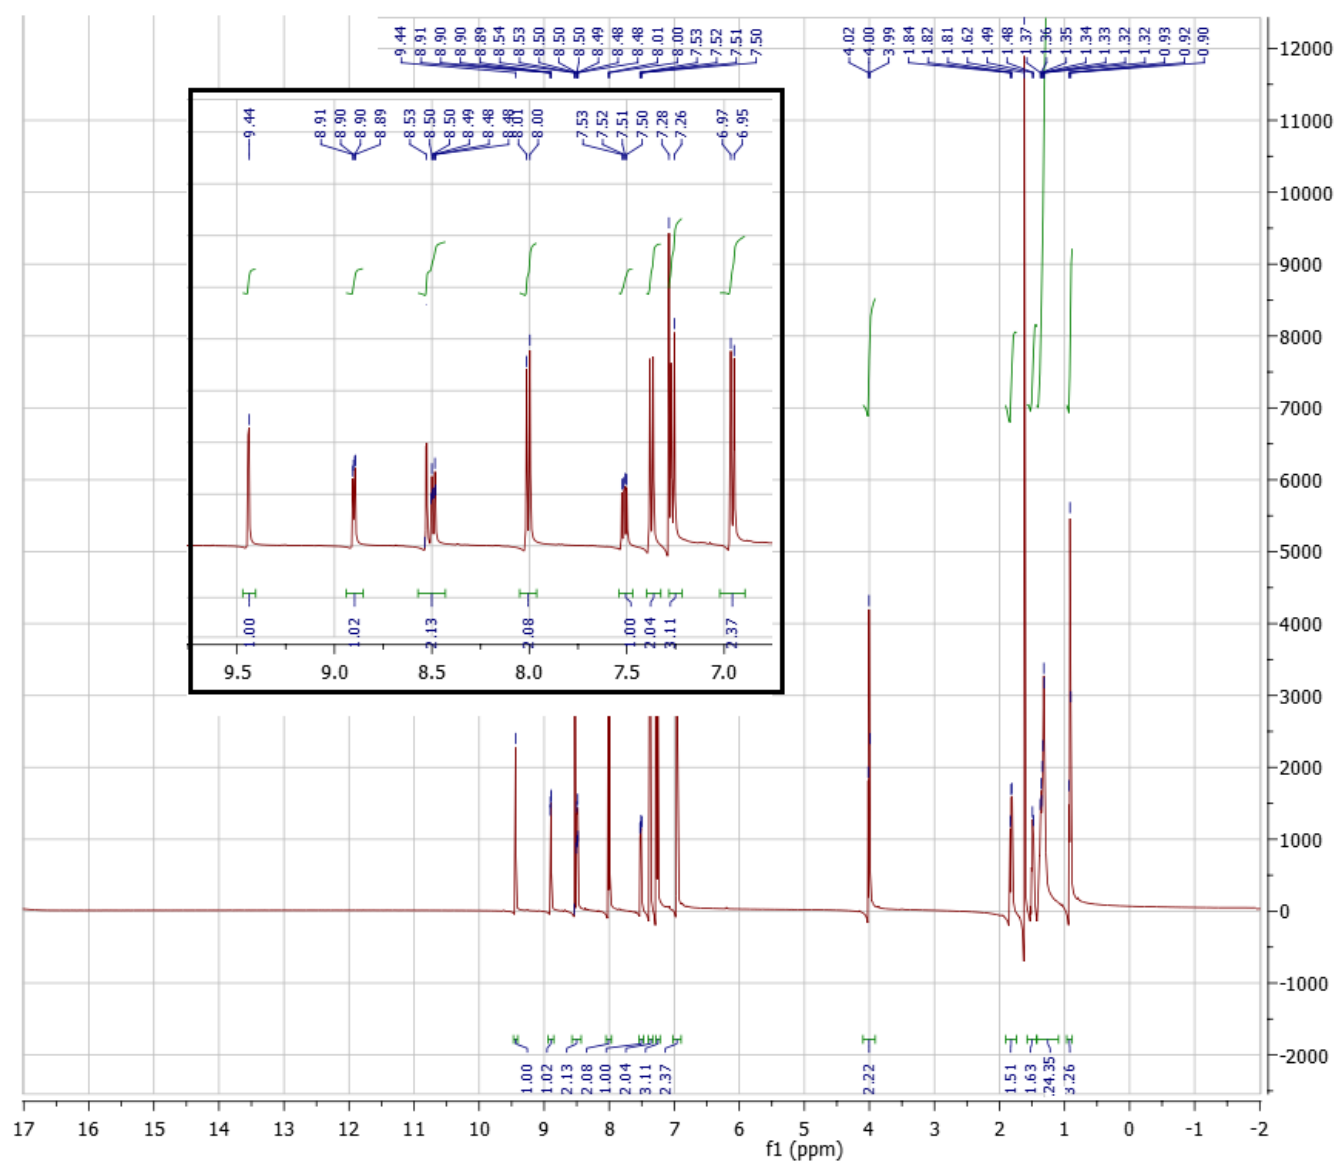

**Figure S2.**  $^1\text{H}$ NMR of Pyridin-2-yl 4-[4-(hexadecyloxy)phenyliminomethyl]benzoate (**I C16**).
